# Supplementary material for: Diurnal Variation in Frequency and Severity of Croup in the Emergency Department
Source: Oxford University Press journal article supplement (doi:10.1542/hpeds.2022-006682), 2022-09-22
Supplement: hpeds.2022-006682supplementarydata.pdf [file hpeds.2022-006682supplementarydata.pdf]

## Supplemental Information

**SUPPLEMENTAL TABLE 3** Sensitivity Analysis With 3 Categories for Arrival Time

| Outcome                       | Arrival Time | Odds Ratio | 95% Confidence Interval |
|-------------------------------|--------------|------------|-------------------------|
| Hospitalization               | Daytime      | Ref        |                         |
|                               | Evening      | 1.01       | 0.97-1.06               |
|                               | Overnight    | 0.73       | 0.7-0.76                |
| Racemic epinephrine           | Daytime      | Ref        |                         |
|                               | Evening      | 1.18       | 1.15-1.21               |
|                               | Overnight    | 1.45       | 1.41-1.49               |
| Intensive care unit admission | Daytime      | Ref        |                         |
|                               | Evening      | 0.91       | 0.81-1.02               |
|                               | Overnight    | 0.56       | 0.5-0.64                |
| Revisits                      | Daytime      | Ref        |                         |
|                               | Evening      | 0.93       | 0.88-0.98               |
|                               | Overnight    | 0.85       | 0.8-0.89                |
